# Supplementary material for: Solid phase lipid synthesis (SPLS) for construction of an artificial glycolipid library
Source: Royal Society of Chemistry journal article supplement (doi:10.1039/b002545n), 2000-01-01
Supplement: b002545n.doc [file b002545n.doc]

**Electronic Supplementary Information**

**Experimental Section**

Release of **Glc-asp(NH2)-2C12** from resin **5**: Resin **5** (200 mg) was suspended in THF/MeOH mixture (4/1, 8.0 ml) and NH2NH2 (1.0 ml) was added. After stirred for 5 h at room temperature, the resin was filtered off and solution was evaporated in vacuo. The residue was purified by gel column chromatography (Sephadex LH 20, CHCl3/MeOH = 1/1) to obtain colorless solid of **Glc-asp(NH2)-2C12** (24 mg, 67 %). MALDI-TOF-Mass for C40H77N5O10 (M.W. = 788.07) : m/z = 811.07 [M+Na]+, m/z = 827.05 [M+K] +. 1H-NMR [12] (600 MHz, CDCl3/CD3OD = 5/1)  4.73 (t, 1H, *J* = 5.7, CH),  4.24 (d, 1H, *J* = 7.4, H-1),  3.90 (m, 2H, H-4, OC*H2*CH2NH),  3.85 (dd, 1H, *J* = 6.4, 11,4, H-6),  3.76 (m, 1H, H-6),  3.68 (m, 1H, OC*H2*CH2NH), 3.58 - 3.54 (m, 4H, H-2, H-3, H-5, OCH2C*H2*NH), 3.34 (m, 1H, OCH2C*H2*NH), 3.25 (m, 4H, NC*H2*(CH2)10CH3), 2.79 (m, 1H, NHCOCH2C*H2*CON), 2.77 (dd, 1H, *J* = 6.5, 14.6, COC*H2*CH), 2.62 (dd, 1H, *J* = 5.5, 14.2, COC*H2*CH), 2.60 (m, 1H, NHCOC*H2*CH2CON), 2.51 (m, 1H, NHCOCH2C*H2*CON), 2.44 (m, 1H, NHCOC*H2*CH2CON), 1.58 (m, 2H, NCH2C*H2*(CH2)9CH3), 1.49 (m, 2H, NCH2C*H2*(CH2)9CH3), 1.32 - 1.23 (m, 36H, NCH2CH2(C*H2*)9CH3), 0.88 (t, 6H, *J* = 6.3, NCH2(CH2)10C*H3*).

Synthesis of **Glc-asp(CO2H)-2C12**: resin **5** (300 mg) was suspended in THF and photo-irradiated (Hg-lamp) for 24 h under N2 atmosphere at 25 °C. The resin was filtered off, and the solution was evaporated in vacuo. The residue in dry CH2Cl2 / dry MeOH mixture (5/2, 7 ml) was stirred for 3 h in the presence of 4N methanolic NaOMe solution (0.2 ml) at room temperature. After neutralization by addition of Amberilite IRC-50, the resin was filtered off, and the filtrate was evaporated in vacuo. The residue was purified by gel column chromatography (Sephadex LH20. CHCl3/MeOH = 1/1) to yield colorless solid of **Glc-asp(CO2H)-2C12** (24 mg, 39 %). MALDI-TOF-Mass for C40H75N3O11 (M.W. = 774.04) : m/z = 796.98 [M+Na]+, m/z = 818.96 [M+2Na] +. 1H-NMR (600 MHz, CDCl3/CD3OD = 5/1)  4.71 (t, 1H, *J* = 4.9, CH),  4.25 (d, 1H, *J* = 7.5, H-1),  3.89 (m, 2H, H-4, OC*H2*CH2NH),  3.85 (m, 1H, H-6),  3.75 (dd, 1H, *J* = 4.7, 11,7, H-6),  3.70 (m, 1H, OC*H2*CH2NH), 3.58 (t, 1H, *J* = 8.1, H-2), 3.53 - 3.51 (m, 2H, H-3, H-5), 3.43 (m, 2H, OCH2C*H2*NH), 3.25 (m, 4H, NC*H2*(CH2)10CH3), 2.77 (dd, 1H, COC*H2*CH),  2.73 (dd, 1H, COC*H2*CH), 2.70 - 2.55 (m, 4H, NHCOCH2CH2CON), 1.58 (m, 2H, NCH2C*H2*(CH2)9CH3), 1.49 (m, 2H, NCH2C*H2*(CH2)9CH3), 1.32 - 1.23 (m, 36H, NCH2CH2(C*H2*)9CH3), 0.88 (t, 6H, *J* = 7.0, NCH2(CH2)10C*H3*).
